# Supplementary material for: Upregulation of desmoglein 2 and its clinical value in lung adenocarcinoma: a comprehensive analysis by multiple bioinformatics methods
Source: PeerJ. 2020 Feb 13;8:e8420. doi: 10.7717/peerj.8420 (PMC7024574; doi:10.7717/peerj.8420)
Supplement: Supplemental Information 2 [file peerj-08-8420-s002.xlsx]

## Sheet: TCGA的DSG2数据
sample	DSG2	type
TCGA-64-5774-01	6.73951	tumor
TCGA-78-7167-01	7.11655	tumor
TCGA-64-1677-01	7.0411	tumor
TCGA-97-8174-01	5.94517	tumor
TCGA-73-4658-01	7.75477	tumor
TCGA-MP-A4T8-01	6.56343	tumor
TCGA-78-7158-01	6.94049	tumor
TCGA-55-7574-01	5.07492	tumor
TCGA-78-7540-01	7.67136	tumor
TCGA-55-7728-01	4.55145	tumor
TCGA-MP-A4TC-01	7.26607	tumor
TCGA-44-3396-11	5.24902	normal
TCGA-44-2655-01	6.75004	tumor
TCGA-91-6831-11	5.59189	normal
TCGA-44-A4SU-01	5.35775	tumor
TCGA-86-8359-01	6.4472	tumor
TCGA-49-AAR9-01	8.48878	tumor
TCGA-50-6597-01	5.08621	tumor
TCGA-86-8669-01	6.14194	tumor
TCGA-49-4486-01	5.71359	tumor
TCGA-50-5930-11	5.46774	normal
TCGA-55-8513-01	6.53576	tumor
TCGA-64-1681-01	5.94451	tumor
TCGA-55-7903-01	7.14004	tumor
TCGA-86-8054-01	6.76447	tumor
TCGA-55-6987-01	4.94069	tumor
TCGA-73-4659-01	5.72326	tumor
TCGA-50-8459-01	6.63707	tumor
TCGA-50-8460-01	5.17868	tumor
TCGA-NJ-A4YP-01	6.44448	tumor
TCGA-50-5936-11	5.64436	normal
TCGA-44-6779-01	7.91181	tumor
TCGA-55-6642-01	5.93419	tumor
TCGA-55-8507-01	6.41227	tumor
TCGA-62-A46Y-01	6.84026	tumor
TCGA-78-7537-01	5.01559	tumor
TCGA-69-8453-01	5.80723	tumor
TCGA-44-2659-01	6.06612	tumor
TCGA-80-5611-01	6.6921	tumor
TCGA-NJ-A4YI-01	6.42467	tumor
TCGA-05-4425-01	5.48236	tumor
TCGA-91-7771-01	6.2044	tumor
TCGA-44-6775-01	6.43303	tumor
TCGA-NJ-A4YG-01	6.20037	tumor
TCGA-95-8039-01	6.07482	tumor
TCGA-55-A4DG-01	6.46674	tumor
TCGA-50-8457-01	5.90723	tumor
TCGA-50-5051-01	4.53295	tumor
TCGA-44-2665-01	7.65677	tumor
TCGA-78-7147-01	6.01981	tumor
TCGA-73-4670-01	5.94855	tumor
TCGA-55-7910-01	5.18732	tumor
TCGA-05-4398-01	6.98097	tumor
TCGA-55-6982-11	5.55266	normal
TCGA-78-7153-01	5.39175	tumor
TCGA-55-5899-01	7.0361	tumor
TCGA-38-4630-01	7.2464	tumor
TCGA-78-7148-01	7.20636	tumor
TCGA-86-A456-01	5.9581	tumor
TCGA-78-7143-01	6.61135	tumor
TCGA-44-6776-01	5.14802	tumor
TCGA-97-8547-01	5.87603	tumor
TCGA-75-7030-01	7.15169	tumor
TCGA-J2-A4AD-01	7.83167	tumor
TCGA-44-3398-11	5.67129	normal
TCGA-62-A46O-01	6.54643	tumor
TCGA-69-8255-01	5.29889	tumor
TCGA-55-8619-01	5.56271	tumor
TCGA-44-5643-01	8.18402	tumor
TCGA-38-4625-11	4.33931	normal
TCGA-55-6980-11	5.18254	normal
TCGA-55-7911-01	7.38495	tumor
TCGA-50-5931-11	5.16662	normal
TCGA-97-A4M2-01	4.75623	tumor
TCGA-95-7039-01	7.58506	tumor
TCGA-55-6982-01	7.5986	tumor
TCGA-75-6211-01	2.29937	tumor
TCGA-50-6590-01	7.60872	tumor
TCGA-53-A4EZ-01	6.25681	tumor
TCGA-53-7813-01	5.61448	tumor
TCGA-97-A4LX-01	5.19142	tumor
TCGA-97-7552-01	6.91163	tumor
TCGA-73-4662-01	6.31089	tumor
TCGA-44-6146-01	7.0355	tumor
TCGA-49-6744-01	6.65668	tumor
TCGA-44-6144-11	5.22577	normal
TCGA-69-7979-01	6.37187	tumor
TCGA-64-1678-01	6.03955	tumor
TCGA-71-6725-01	3.88686	tumor
TCGA-53-7626-01	6.02519	tumor
TCGA-73-4676-11	4.63587	normal
TCGA-05-4402-01	6.51254	tumor
TCGA-86-A4JF-01	6.25795	tumor
TCGA-69-7973-01	7.27234	tumor
TCGA-44-A47B-01	5.16296	tumor
TCGA-78-7633-01	7.0794	tumor
TCGA-49-AAQV-01	5.82783	tumor
TCGA-55-7995-01	5.11915	tumor
TCGA-64-1676-01	6.15627	tumor
TCGA-MP-A4T6-01	5.25747	tumor
TCGA-55-7727-01	7.72148	tumor
TCGA-78-7146-01	7.81935	tumor
TCGA-55-8094-01	6.83352	tumor
TCGA-50-5045-01	6.11271	tumor
TCGA-55-8511-01	8.05826	tumor
TCGA-55-6986-01	6.93335	tumor
TCGA-95-7944-01	6.27156	tumor
TCGA-62-8399-01	7.17341	tumor
TCGA-86-6562-01	7.38986	tumor
TCGA-L4-A4E5-01	5.71421	tumor
TCGA-93-A4JN-01	7.33318	tumor
TCGA-78-7149-01	5.98146	tumor
TCGA-55-6971-11	5.59001	normal
TCGA-91-A4BD-01	3.69351	tumor
TCGA-78-7159-01	5.52782	tumor
TCGA-50-5930-01	6.71575	tumor
TCGA-MP-A4SV-01	6.86636	tumor
TCGA-55-1594-01	6.783	tumor
TCGA-99-8028-01	4.99404	tumor
TCGA-67-6216-01	6.13033	tumor
TCGA-44-2666-01	7.0587	tumor
TCGA-69-7763-01	6.88773	tumor
TCGA-67-3772-01	5.34056	tumor
TCGA-97-A4M0-01	5.38134	tumor
TCGA-91-6849-01	5.4319	tumor
TCGA-62-A470-01	5.0944	tumor
TCGA-97-7546-01	6.53798	tumor
TCGA-55-7816-01	7.19111	tumor
TCGA-55-8615-01	6.67707	tumor
TCGA-86-6851-01	4.89313	tumor
TCGA-MP-A4SY-01	8.09505	tumor
TCGA-49-4488-01	6.09031	tumor
TCGA-69-7764-01	6.86162	tumor
TCGA-93-7347-01	5.9448	tumor
TCGA-50-5936-01	7.14635	tumor
TCGA-73-A9RS-01	7.07316	tumor
TCGA-86-8672-01	6.49749	tumor
TCGA-55-7281-01	5.84314	tumor
TCGA-NJ-A55A-01	5.55008	tumor
TCGA-05-4403-01	7.95645	tumor
TCGA-44-2662-01	7.87672	tumor
TCGA-50-6673-01	7.44284	tumor
TCGA-97-8176-01	6.29017	tumor
TCGA-J2-8194-01	6.01689	tumor
TCGA-55-7284-01	7.18702	tumor
TCGA-55-6968-11	4.97061	normal
TCGA-55-6981-01	7.2257	tumor
TCGA-44-6147-01	5.61407	tumor
TCGA-55-6970-01	7.89607	tumor
TCGA-44-3396-01	7.31165	tumor
TCGA-44-6778-01	3.90754	tumor
TCGA-75-6214-01	7.39411	tumor
TCGA-97-7547-01	7.02504	tumor
TCGA-67-3773-01	5.88859	tumor
TCGA-44-6145-01	6.56861	tumor
TCGA-55-1592-01	5.83154	tumor
TCGA-55-8097-01	4.40176	tumor
TCGA-55-6968-01	6.43978	tumor
TCGA-55-6979-11	5.04506	normal
TCGA-MP-A4TE-01	6.43826	tumor
TCGA-49-4514-01	4.40052	tumor
TCGA-95-7947-01	6.57806	tumor
TCGA-55-7815-01	7.71276	tumor
TCGA-86-8074-01	7.36884	tumor
TCGA-44-A479-01	5.4735	tumor
TCGA-78-7145-01	7.01505	tumor
TCGA-44-2655-11	4.94981	normal
TCGA-78-7166-01	5.69651	tumor
TCGA-91-A4BC-01	4.24043	tumor
TCGA-55-6975-11	5.68626	normal
TCGA-38-4629-01	7.34446	tumor
TCGA-05-4424-01	5.70169	tumor
TCGA-91-6828-11	5.79226	normal
TCGA-55-7914-01	6.75756	tumor
TCGA-MP-A4TF-01	8.25474	tumor
TCGA-93-8067-01	7.37782	tumor
TCGA-NJ-A55O-01	5.31682	tumor
TCGA-50-5044-01	7.15409	tumor
TCGA-38-A44F-01	5.81103	tumor
TCGA-78-7539-01	6.33686	tumor
TCGA-38-7271-01	5.55245	tumor
TCGA-62-A46V-01	5.80049	tumor
TCGA-55-6984-01	7.92064	tumor
TCGA-80-5608-01	5.98919	tumor
TCGA-86-A4P7-01	4.80317	tumor
TCGA-L4-A4E6-01	4.46212	tumor
TCGA-L9-A8F4-01	6.5234	tumor
TCGA-69-8253-01	7.02537	tumor
TCGA-50-5049-01	5.38539	tumor
TCGA-44-A47G-01	8.26474	tumor
TCGA-05-4390-01	7.02118	tumor
TCGA-50-5072-01	7.70671	tumor
TCGA-55-8203-01	6.16876	tumor
TCGA-78-8640-01	6.7367	tumor
TCGA-55-6975-01	6.65982	tumor
TCGA-73-4676-01	8.6895	tumor
TCGA-49-6743-11	5.36557	normal
TCGA-L9-A7SV-01	6.481	tumor
TCGA-97-8177-01	4.85385	tumor
TCGA-49-4510-01	5.35361	tumor
TCGA-05-5715-01	5.86031	tumor
TCGA-50-5942-01	6.43496	tumor
TCGA-44-5645-11	4.88964	normal
TCGA-55-8299-01	5.97106	tumor
TCGA-50-6595-11	5.42487	normal
TCGA-86-8280-01	4.53816	tumor
TCGA-05-4395-01	6.85363	tumor
TCGA-86-7955-01	7.65058	tumor
TCGA-44-2662-11	4.78721	normal
TCGA-L9-A743-01	5.96623	tumor
TCGA-55-8506-01	6.84255	tumor
TCGA-75-5122-01	5.5381	tumor
TCGA-99-8033-01	7.39424	tumor
TCGA-67-4679-01	5.6165	tumor
TCGA-49-6744-11	5.94224	normal
TCGA-49-AARN-01	5.9894	tumor
TCGA-50-6593-01	7.06631	tumor
TCGA-95-7567-01	5.62337	tumor
TCGA-44-3918-01	6.73137	tumor
TCGA-50-5933-01	7.97249	tumor
TCGA-75-6203-01	4.66099	tumor
TCGA-05-4244-01	7.01259	tumor
TCGA-91-8497-01	5.54598	tumor
TCGA-49-4490-11	5.20854	normal
TCGA-44-3917-01	5.89247	tumor
TCGA-44-A4SS-01	7.86761	tumor
TCGA-49-4487-01	4.53066	tumor
TCGA-44-2657-11	4.64182	normal
TCGA-97-8552-01	5.39065	tumor
TCGA-55-7724-01	6.23926	tumor
TCGA-38-4625-01	6.94365	tumor
TCGA-55-6980-01	7.09605	tumor
TCGA-69-7765-01	6.4093	tumor
TCGA-38-4626-01	5.55266	tumor
TCGA-78-7163-01	5.23455	tumor
TCGA-95-7043-01	5.20658	tumor
TCGA-05-4433-01	7.59077	tumor
TCGA-62-8395-01	6.10134	tumor
TCGA-05-5420-01	5.94874	tumor
TCGA-50-5946-01	6.41937	tumor
TCGA-MP-A4TH-01	5.68892	tumor
TCGA-38-6178-01	7.52236	tumor
TCGA-44-8119-01	5.79222	tumor
TCGA-L9-A50W-01	5.09507	tumor
TCGA-MP-A4TJ-01	5.47122	tumor
TCGA-80-5607-01	7.73926	tumor
TCGA-55-6985-11	4.75804	normal
TCGA-05-4415-01	8.01313	tumor
TCGA-55-8505-01	7.91786	tumor
TCGA-67-6215-01	6.90973	tumor
TCGA-49-4507-01	6.85816	tumor
TCGA-86-8075-01	8.45928	tumor
TCGA-55-6981-11	5.03243	normal
TCGA-55-6972-01	6.1458	tumor
TCGA-91-6829-01	6.55419	tumor
TCGA-62-8394-01	5.97826	tumor
TCGA-99-AA5R-01	4.4346	tumor
TCGA-55-7227-01	6.67547	tumor
TCGA-75-7025-01	4.99982	tumor
TCGA-55-8091-01	5.83978	tumor
TCGA-50-6592-01	8.27927	tumor
TCGA-05-4249-01	5.95233	tumor
TCGA-44-6777-11	5.26499	normal
TCGA-44-6146-11	5.74331	normal
TCGA-86-8076-01	5.77056	tumor
TCGA-86-8055-01	8.58905	tumor
TCGA-55-A57B-01	5.96301	tumor
TCGA-38-4626-11	4.37749	normal
TCGA-44-2668-01	8.83577	tumor
TCGA-86-7714-01	6.44215	tumor
TCGA-75-5126-01	7.56305	tumor
TCGA-MP-A4SW-01	6.11231	tumor
TCGA-91-6836-11	5.15185	normal
TCGA-49-4505-01	5.70789	tumor
TCGA-55-8096-01	6.88842	tumor
TCGA-50-6594-01	6.9789	tumor
TCGA-73-7499-01	5.13446	tumor
TCGA-71-8520-01	6.158	tumor
TCGA-78-7160-01	6.98797	tumor
TCGA-38-4632-01	5.67062	tumor
TCGA-50-5931-01	6.96174	tumor
TCGA-64-5775-01	6.74973	tumor
TCGA-35-5375-01	5.1107	tumor
TCGA-MP-A4TI-01	6.27282	tumor
TCGA-55-A491-01	5.33578	tumor
TCGA-49-6767-01	7	tumor
TCGA-55-8508-01	5.40362	tumor
TCGA-55-8514-01	3.84533	tumor
TCGA-49-AAR4-01	6.61003	tumor
TCGA-67-3770-01	5.83595	tumor
TCGA-86-8056-01	7.48292	tumor
TCGA-MP-A4TK-01	6.73835	tumor
TCGA-78-7161-01	5.74331	tumor
TCGA-55-8090-01	7.5269	tumor
TCGA-L9-A443-01	6.28624	tumor
TCGA-64-1680-01	7.17541	tumor
TCGA-MP-A4TD-01	4.50336	tumor
TCGA-86-8671-01	4.58307	tumor
TCGA-86-8358-01	6.7208	tumor
TCGA-83-5908-01	8.63974	tumor
TCGA-49-AARQ-01	3.25056	tumor
TCGA-99-7458-01	8.18217	tumor
TCGA-44-4112-01	7.19355	tumor
TCGA-44-5645-01	5.57483	tumor
TCGA-55-6978-11	5.32077	normal
TCGA-55-7576-01	7.55463	tumor
TCGA-55-6983-01	4.57943	tumor
TCGA-55-8614-01	7.20658	tumor
TCGA-91-6830-01	7.17551	tumor
TCGA-69-7978-01	7.79484	tumor
TCGA-86-A4D0-01	5.71575	tumor
TCGA-44-8117-01	7.86937	tumor
TCGA-49-6761-11	5.09743	normal
TCGA-44-3398-01	7.72118	tumor
TCGA-44-6148-11	5.41845	normal
TCGA-50-5941-01	6.53509	tumor
TCGA-75-5125-01	7.37872	tumor
TCGA-75-5146-01	6.10263	tumor
TCGA-44-6774-01	6.00657	tumor
TCGA-05-4250-01	7.97087	tumor
TCGA-49-AAR2-01	1.02539	tumor
TCGA-MP-A4T9-01	7.35863	tumor
TCGA-50-5944-01	6.29592	tumor
TCGA-55-7913-01	6.29647	tumor
TCGA-55-6970-11	5.22434	normal
TCGA-55-A494-01	6.58334	tumor
TCGA-49-AAR3-01	6.17698	tumor
TCGA-62-A46S-01	5.34878	tumor
TCGA-62-8402-01	6.98548	tumor
TCGA-95-A4VK-01	6.53988	tumor
TCGA-35-3615-01	5.49944	tumor
TCGA-78-7156-01	7.02747	tumor
TCGA-NJ-A55R-01	6.90276	tumor
TCGA-86-7954-01	5.03279	tumor
TCGA-78-7220-01	8.20758	tumor
TCGA-55-8092-01	6.14373	tumor
TCGA-78-8648-01	5.18112	tumor
TCGA-78-7154-01	7.61245	tumor
TCGA-69-8254-01	7.49205	tumor
TCGA-55-8616-01	6.49184	tumor
TCGA-49-6745-01	9.03391	tumor
TCGA-78-7536-01	6.54384	tumor
TCGA-55-7283-01	5.93444	tumor
TCGA-86-7701-01	6.13976	tumor
TCGA-49-6742-11	5.89405	normal
TCGA-44-7660-01	6.59636	tumor
TCGA-44-7667-01	6.80445	tumor
TCGA-49-4490-01	6.10036	tumor
TCGA-50-5939-01	8.53539	tumor
TCGA-49-AARO-01	6.41612	tumor
TCGA-78-7542-01	9.31795	tumor
TCGA-05-4420-01	6.54136	tumor
TCGA-05-4417-01	5.58688	tumor
TCGA-49-AARE-01	2.58474	tumor
TCGA-05-4430-01	6.32558	tumor
TCGA-05-4427-01	7.40013	tumor
TCGA-91-6835-11	6.29674	normal
TCGA-38-4632-11	4.5786	normal
TCGA-MN-A4N1-01	6.52015	tumor
TCGA-05-4410-01	6.70218	tumor
TCGA-97-8179-01	6.15094	tumor
TCGA-44-7671-01	6.9168	tumor
TCGA-62-A46P-01	3.79019	tumor
TCGA-55-6543-01	5.83581	tumor
TCGA-44-7659-01	5.81997	tumor
TCGA-MP-A4T4-01	7.05058	tumor
TCGA-97-A4M1-01	5.03409	tumor
TCGA-55-6971-01	5.25083	tumor
TCGA-64-5815-01	7.90006	tumor
TCGA-44-A47A-01	5.69513	tumor
TCGA-75-6206-01	6.8419	tumor
TCGA-91-6835-01	6.96916	tumor
TCGA-55-7573-01	5.88784	tumor
TCGA-50-5068-01	5.1049	tumor
TCGA-91-6829-11	4.43943	normal
TCGA-50-5932-11	5.79716	normal
TCGA-44-3919-01	6.94744	tumor
TCGA-4B-A93V-01	6.34746	tumor
TCGA-97-A4M7-01	5.659	tumor
TCGA-38-4631-01	6.57693	tumor
TCGA-MP-A5C7-01	6.2018	tumor
TCGA-J2-8192-01	6.97081	tumor
TCGA-44-6776-11	4.94842	normal
TCGA-55-8089-01	8.15646	tumor
TCGA-05-5423-01	6.04418	tumor
TCGA-73-4666-01	7.21914	tumor
TCGA-86-A4P8-01	4.92728	tumor
TCGA-64-1679-01	7.49791	tumor
TCGA-50-5935-01	6.44687	tumor
TCGA-97-A4M3-01	6.14378	tumor
TCGA-78-8660-01	6.42655	tumor
TCGA-99-8025-01	6.45256	tumor
TCGA-67-3774-01	6.36869	tumor
TCGA-91-6836-01	6.63553	tumor
TCGA-55-7726-01	7.21668	tumor
TCGA-55-8510-01	6.25783	tumor
TCGA-55-7994-01	7.1336	tumor
TCGA-75-6207-01	6.87756	tumor
TCGA-55-8621-01	6.10436	tumor
TCGA-44-7669-01	7.76717	tumor
TCGA-49-4512-11	5.17593	normal
TCGA-L9-A444-01	5.21236	tumor
TCGA-86-8073-01	9.16617	tumor
TCGA-93-A4JP-01	5.94886	tumor
TCGA-38-4628-01	5.91545	tumor
TCGA-44-6777-01	6.25447	tumor
TCGA-73-4675-01	5.8005	tumor
TCGA-44-6148-01	6.02208	tumor
TCGA-97-8175-01	8.38872	tumor
TCGA-J2-A4AE-01	5.62982	tumor
TCGA-05-4426-01	7.00994	tumor
TCGA-49-4506-01	5.73206	tumor
TCGA-67-3771-01	7.21753	tumor
TCGA-78-7152-01	6.4141	tumor
TCGA-62-A46R-01	5.02031	tumor
TCGA-97-7941-01	6.32201	tumor
TCGA-05-4432-01	6.49742	tumor
TCGA-44-8120-01	6.6144	tumor
TCGA-55-8208-01	5.82001	tumor
TCGA-50-5066-01	5.05367	tumor
TCGA-73-4677-01	6.99911	tumor
TCGA-55-1596-01	6.12693	tumor
TCGA-05-4418-01	6.96505	tumor
TCGA-97-8171-01	5.64436	tumor
TCGA-L9-A5IP-01	8.21905	tumor
TCGA-55-8087-01	4.58555	tumor
TCGA-55-A493-01	7.37807	tumor
TCGA-93-7348-01	5.61271	tumor
TCGA-91-6848-01	7.54993	tumor
TCGA-55-6969-11	4.94355	normal
TCGA-44-7661-01	9.09846	tumor
TCGA-44-2661-01	4.94092	tumor
TCGA-86-8585-01	5.70633	tumor
TCGA-95-A4VP-01	4.54146	tumor
TCGA-50-5935-11	5.92397	normal
TCGA-95-A4VN-01	8.01714	tumor
TCGA-MP-A4TA-01	7.19593	tumor
TCGA-55-8207-01	6.2302	tumor
TCGA-NJ-A4YF-01	6.21205	tumor
TCGA-69-7760-01	5.69175	tumor
TCGA-05-4397-01	6.8313	tumor
TCGA-35-4122-01	6.66416	tumor
TCGA-05-4384-01	6.71247	tumor
TCGA-62-8397-01	4.89917	tumor
TCGA-05-5429-01	7.13981	tumor
TCGA-62-A471-01	6.47208	tumor
TCGA-55-6978-01	8.21368	tumor
TCGA-49-6761-01	8.35812	tumor
TCGA-99-8032-01	5.64442	tumor
TCGA-75-6212-01	5.31071	tumor
TCGA-78-8655-01	6.7024	tumor
TCGA-55-7570-01	7.46572	tumor
TCGA-NJ-A4YQ-01	7.00395	tumor
TCGA-J2-A4AG-01	6.82962	tumor
TCGA-95-7948-01	6.30443	tumor
TCGA-78-8662-01	5.77843	tumor
TCGA-NJ-A7XG-01	6.96633	tumor
TCGA-49-6745-11	5.38421	normal
TCGA-91-6831-01	6.43314	tumor
TCGA-55-6979-01	5.47846	tumor
TCGA-91-6828-01	6.68272	tumor
TCGA-62-A472-01	6.82946	tumor
TCGA-MN-A4N4-01	5.62401	tumor
TCGA-55-6985-01	6.05889	tumor
TCGA-91-6847-11	5.82335	normal
TCGA-49-6742-01	7.30315	tumor
TCGA-55-6712-01	7.79227	tumor
TCGA-55-8085-01	5.88234	tumor
TCGA-62-8398-01	8.09864	tumor
TCGA-44-2656-01	6.74343	tumor
TCGA-55-8301-01	4.70555	tumor
TCGA-86-8674-01	5.38352	tumor
TCGA-05-4422-01	5.33193	tumor
TCGA-38-4627-01	5.70378	tumor
TCGA-50-5933-11	5.64219	normal
TCGA-75-7027-01	7.20971	tumor
TCGA-97-8172-01	3.42348	tumor
TCGA-55-7907-01	7.08312	tumor
TCGA-55-A48Z-01	5.92398	tumor
TCGA-05-5425-01	5.87865	tumor
TCGA-55-8206-01	5.47479	tumor
TCGA-78-7535-01	4.27253	tumor
TCGA-86-8279-01	3.58074	tumor
TCGA-93-A4JQ-01	7.13819	tumor
TCGA-78-7150-01	7.42883	tumor
TCGA-91-6840-01	6.67937	tumor
TCGA-MN-A4N5-01	7.17311	tumor
TCGA-55-6986-11	5.15042	normal
TCGA-55-6972-11	5.07694	normal
TCGA-05-4382-01	7.23381	tumor
TCGA-78-7155-01	7.2091	tumor
TCGA-64-5781-01	6.89051	tumor
TCGA-44-5644-01	7.53232	tumor
TCGA-44-6778-11	4.83043	normal
TCGA-38-4627-11	4.47731	normal
TCGA-55-8620-01	5.90356	tumor
TCGA-97-A4M5-01	6.31942	tumor
TCGA-86-8278-01	6.44534	tumor
TCGA-55-8205-01	7.7872	tumor
TCGA-44-2665-11	5.21944	normal
TCGA-95-7562-01	6.51301	tumor
TCGA-55-A48Y-01	6.32547	tumor
TCGA-49-AARR-01	4.26116	tumor
TCGA-55-A492-01	4.29886	tumor
TCGA-50-5055-01	5.67483	tumor
TCGA-95-8494-01	7.79187	tumor
TCGA-55-8302-01	8.15172	tumor
TCGA-67-6217-01	4.91196	tumor
TCGA-O1-A52J-01	6.10604	tumor
TCGA-97-7938-01	7.38585	tumor
TCGA-49-6743-01	6.73485	tumor
TCGA-35-4123-01	8.03325	tumor
TCGA-44-6147-11	5.43371	normal
TCGA-05-4434-01	6.16009	tumor
TCGA-44-6145-11	5.39082	normal
TCGA-49-4512-01	3.79639	tumor
TCGA-75-6205-01	7.46768	tumor
TCGA-91-8496-01	6.17604	tumor
TCGA-69-7980-01	7.15977	tumor
TCGA-44-2657-01	5.14472	tumor
TCGA-55-6984-11	5.71098	normal
TCGA-97-7553-01	5.9905	tumor
TCGA-91-6847-01	7.46567	tumor
TCGA-93-A4JO-01	4.35162	tumor
TCGA-53-7624-01	6.50343	tumor
TCGA-97-7554-01	7.67922	tumor
TCGA-50-7109-01	2.40189	tumor
TCGA-55-6983-11	5.73161	normal
TCGA-05-4396-01	6.59972	tumor
TCGA-55-A490-01	6.0142	tumor
TCGA-78-7162-01	6.38659	tumor
TCGA-86-8281-01	6.317	tumor
TCGA-97-A4M6-01	4.67296	tumor
TCGA-91-8499-01	8.16751	tumor
TCGA-49-AAR0-01	4.74192	tumor
TCGA-73-7498-01	5.4892	tumor
TCGA-55-7725-01	5.17366	tumor
TCGA-86-8668-01	7.0376	tumor
TCGA-73-4668-01	7.85802	tumor
TCGA-55-A4DF-01	6.23382	tumor
TCGA-64-5778-01	6.15439	tumor
TCGA-49-4494-01	7.15813	tumor
TCGA-86-8673-01	5.96544	tumor
TCGA-44-7662-01	6.37975	tumor
TCGA-50-6595-01	7.9349	tumor
TCGA-49-4501-01	6.01463	tumor
TCGA-50-5939-11	5.47346	normal
TCGA-44-7672-01	6.38139	tumor
TCGA-44-2661-11	5.45661	normal
TCGA-50-6591-01	4.53991	tumor
TCGA-44-7670-01	7.55695	tumor
TCGA-S2-AA1A-01	4.89959	tumor
TCGA-86-7713-01	10.5933	tumor
TCGA-86-7953-01	6.26401	tumor
TCGA-44-2668-11	5.21828	normal
TCGA-MP-A4T7-01	5.99215	tumor
TCGA-91-6849-11	5.2378	normal
TCGA-75-5147-01	5.9467	tumor
TCGA-75-7031-01	5.88977	tumor
TCGA-64-5779-01	6.86461	tumor
TCGA-69-7974-01	8.4388	tumor
TCGA-55-A48X-01	6.89038	tumor
TCGA-55-8204-01	6.81229	tumor
TCGA-86-7711-01	6.73974	tumor
TCGA-05-5428-01	7.33287	tumor
TCGA-50-5932-01	7.85178	tumor
TCGA-97-7937-01	2.05775	tumor
TCGA-69-7761-01	8.01685	tumor
TCGA-05-4405-01	6.18423	tumor
TCGA-05-4389-01	6.71697	tumor
TCGA-55-8512-01	5.59549	tumor
TCGA-69-A59K-01	5.99551	tumor
