# Supplementary material for: Upregulation of desmoglein 2 and its clinical value in lung adenocarcinoma: a comprehensive analysis by multiple bioinformatics methods
Source: PeerJ. 2020 Feb 13;8:e8420. doi: 10.7717/peerj.8420 (PMC7024574; doi:10.7717/peerj.8420)
Supplement: Supplemental Information 3 [file peerj-08-8420-s003.xlsx]

## Sheet: clinical
Patient Number	age(1:≥60,0:<60)	gender	Smoking history	TNM stage	T	N	2^-ΔCT-cancer	2^-ΔCT-normal
1	1	Male	Yes	II	3	0	0.0399222	0.0117869
2	1	Male	No	I	1	1	0.0648537	0.0491499
3	0	Female	No	II	2	1	0.014082	0.00219231
4	1	Male	Yes	I	2	0	0.031833	0.0253829
5	0	Female	No	II	2	1	0.185137	0.146266
6	0	Male	Yes	II	2	1	0.0641088	0.0429857
7	0	Female	No	III	4	0	0.0595399	0.0122591
8	0	Male	Yes	III	4	2	0.0925686	0.00129754
9	0	Male	Yes	II	2	0	0.0994421	0.0510009
10	1	Male	Yes	I	1	0	0.0174173	0.0287559
11	1	Male	No	III	2	2	0.134904	0.0170589
12	1	Female	No	III	3	1	0.315709	0.120463
13	0	Female	No	I	1	0	0.0485854	0.0297012
14	0	Male	Yes	I	1	0	0.0349152	0.0536603
15	1	Male	No	III	4	0	0.0973956	0.0153388
16	1	Male	Yes	II	1	1	0.0676078	0.0307486
17	1	Male	Yes	II	2	0	0.117984	0.0676078
18	0	Male	Yes	III	2	2	0.0541586	0.0307486
19	1	Male	Yes	II	1	1	0.110083	0.135528
20	0	Male	Yes	II	2	1	0.0908733	0.0107962
21	1	Male	No	I	1	0	0.0117326	0.000196934
22	0	Female	Yes	III	2	2	0.0494918	0.0541586
23	1	Female	No	I	1	0	0.0468221	0.0304658
24	0	Female	Yes	III	1	2	0.0584495	0.0224056
25	1	Female	No	III	2	2	0.073133	0.0589921
26	1	Female	No	II	1	1	0.0881844	0.0296327
27	0	Female	No	II	1	1	0.0481384	0.0269544
28	0	Female	No	III	3	1	0.131215	0.0539089
29	0	Female	Yes	II	1	1	0.0382075	0.0119791
30	1	Female	No	III	4	0	0.0127208	0.000493955
31	0	Female	No	II	3	0	0.0259762	0.0221994
32	0	Female	No	III	3	2	0.0511189	0.00343216
33	0	Female	No	III	4	1	0.0260965	0.00647906
34	0	Female	No	III	2	2	0.233798	0.0386515
35	1	Female	No	II	2	0	0.0676078	0.0309625
36	0	Female	No	III	2	2	0.276752	0.036906
37	0	Female	No	II	2	0	0.0849839	0.0386515
38	1	Male	Yes	III	4	3	0.264866	0.0275208
39	0	Male	No	II	1	1	0.0425902	0.0094859
40	0	Female	No	III	2	2	0.237062	0.00598956

## Sheet: qPCR
Patient Number	CT-DSG2-cancer	CT-DSG2-cancer	CT-DSG2-cancer	CT-ACTIN-cancer	CT-ACTIN-cancer	CT-ACTIN-cancer	CT-DSG2-normal	CT-DSG2-normal	CT-DSG2-normal	CT-ACTIN-normal	CT-ACTIN-normal	CT-ACTIN-normal	CT-DSG2-cancer-mean	CT-ACTIN-cancer-mean	CT-DSG2-normal-mean	CT-ACTIN-normal-mean	ΔCT-cancer	ΔCT-normal	2^-ΔCT-cancer	2^-ΔCT-normal
1	25.21	25.48	25.56	20.79	20.49	21.03	26.64	27.85	27.31	20.26	21.43	20.89	25.4167	20.77	27.2667	20.86	4.64667	6.40667	0.0399222	0.0117869
2	24.3	24.41	24.78	20.37	20.48	20.8	25.54	24.51	25.38	20.63	20.73	21.03	24.4967	20.55	25.1433	20.7967	3.94667	4.34667	0.0648537	0.0491499
3	29.89	30.76	30.58	24.19	24.04	24.55	31.02	31.14	31.63	22.12	22.37	22.8	30.41	24.26	31.2633	22.43	6.15	8.83333	0.014082	0.00219231
4	27.06	27.48	27.21	22.05	22.11	22.67	27.65	27.82	28.06	22.37	22.5	22.76	27.25	22.2767	27.8433	22.5433	4.97333	5.3	0.031833	0.0253829
5	24.07	24.02	24.21	21.67	21.77	21.56	23.35	23.28	23.61	20.49	20.59	20.84	24.1	21.6667	23.4133	20.64	2.43333	2.77333	0.185137	0.146266
6	25.88	25.7	26.01	21.85	21.83	22.02	25.52	25.47	25.88	21.01	20.84	21.4	25.8633	21.9	25.6233	21.0833	3.96333	4.54	0.0641088	0.0429857
7	24.27	24.46	24.47	20.32	20.21	20.46	29.66	29.92	29.83	23.46	23.42	23.48	24.4	20.33	29.8033	23.4533	4.07	6.35	0.0595399	0.0122591
8	24.26	24.15	24.36	20.75	20.87	20.85	32.08	31.92	31.85	22.32	22.29	22.47	24.2567	20.8233	31.95	22.36	3.43333	9.59	0.0925686	0.00129754
9	24.12	23.62	24.07	20.71	20.48	20.63	25.19	25.32	25.02	21.09	20.93	20.63	23.9367	20.6067	25.1767	20.8833	3.33	4.29333	0.0994421	0.0510009
10	29.46	29.47	29.79	23.87	23.71	23.61	29.5	29.28	29.35	24.31	24.23	24.23	29.5733	23.73	29.3767	24.2567	5.84333	5.12	0.0174173	0.0287559
11	25.35	25.51	25.61	22.71	22.45	22.64	26.12	25.02	25.52	19.84	19.55	19.65	25.49	22.6	25.5533	19.68	2.89	5.87333	0.134904	0.0170589
12	24.09	24.36	24.46	22.68	22.67	22.57	24.46	24.63	24.74	21.68	21.44	21.55	24.3033	22.64	24.61	21.5567	1.66333	3.05333	0.315709	0.120463
13	27.65	27.83	27.44	23.17	23.23	23.43	30.82	30.46	30.71	25.56	25.58	25.63	27.64	23.2767	30.6633	25.59	4.36333	5.07333	0.0485854	0.0297012
14	27.28	26.84	26.98	22.27	22.15	22.16	27.31	27.6	27.52	23.2	23.27	23.3	27.0333	22.1933	27.4767	23.2567	4.84	4.22	0.0349152	0.0536603
15	28.07	28.33	28.04	24.89	24.75	24.72	31.06	30.72	30.6	24.78	24.66	24.86	28.1467	24.7867	30.7933	24.7667	3.36	6.02667	0.0973956	0.0153388
16	23.13	23.33	22.93	19.16	19.21	19.36	27.64	27.59	27.61	22.6	22.59	22.58	23.13	19.2433	27.6133	22.59	3.88667	5.02333	0.0676078	0.0307486
17	25.1	25.34	25.28	22.16	22.2	22.11	28.84	28.35	28.52	24.89	24.53	24.63	25.24	22.1567	28.57	24.6833	3.08333	3.88667	0.117984	0.0676078
18	23.42	23.28	23.32	19.1	19.14	19.16	27.79	27.84	27.91	22.7	22.88	22.89	23.34	19.1333	27.8467	22.8233	4.20667	5.02333	0.0541586	0.0307486
19	26.11	25.95	26.35	22.94	22.86	23.06	28.14	28.46	28.68	25.53	25.45	25.65	26.1367	22.9533	28.4267	25.5433	3.18333	2.88333	0.110083	0.135528
20	28.92	29.09	28.82	25.62	25.45	25.38	31.84	31.62	31.62	25.16	25.11	25.21	28.9433	25.4833	31.6933	25.16	3.46	6.53333	0.0908733	0.0107962
21	27.92	27.82	27.71	21.56	21.2	21.45	33.92	34.08	34.07	21.66	21.74	21.74	27.8167	21.4033	34.0233	21.7133	6.41333	12.31	0.0117326	0.000196934
22	25.89	25.72	25.95	21.46	21.46	21.63	29.03	28.69	28.82	24.58	24.66	24.68	25.8533	21.5167	28.8467	24.64	4.33667	4.20667	0.0494918	0.0541586
23	25.51	25.38	25.54	21.08	21.05	21.05	27.47	27.5	27.51	22.45	22.46	22.46	25.4767	21.06	27.4933	22.4567	4.41667	5.03667	0.0468221	0.0304658
24	24.49	24.55	24.35	20.49	20.25	20.36	27.53	27.33	27.21	21.83	21.75	22.05	24.4633	20.3667	27.3567	21.8767	4.09667	5.48	0.0584495	0.0224056
25	25.44	25.67	25.41	21.64	21.8	21.76	26.97	26.62	26.7	22.81	22.69	22.54	25.5067	21.7333	26.7633	22.68	3.77333	4.08333	0.073133	0.0589921
26	26.48	26.66	26.83	23.07	23.13	23.26	28.51	28.77	28.76	23.53	23.6	23.68	26.6567	23.1533	28.68	23.6033	3.50333	5.07667	0.0881844	0.0296327
27	26.08	26.22	25.86	21.76	21.52	21.75	28.02	28.18	27.77	22.81	22.57	22.95	26.0533	21.6767	27.99	22.7767	4.37667	5.21333	0.0481384	0.0269544
28	27.24	27.53	27.1	24.49	24.29	24.3	27.38	27.58	27.56	23.36	23.28	23.24	27.29	24.36	27.5067	23.2933	2.93	4.21333	0.131215	0.0539089
29	30.82	30.49	29.7	25.56	25.66	25.66	30.94	31.34	31.14	24.75	24.86	24.66	30.3367	25.6267	31.14	24.7567	4.71	6.38333	0.0382075	0.0119791
30	27.13	27.57	27.48	21.14	21.09	21.06	31.91	32.14	31.84	20.9	20.97	21.07	27.3933	21.0967	31.9633	20.98	6.29667	10.9833	0.0127208	0.000493955
31	29.65	29.52	29.21	24.16	24.24	24.18	29.34	29.88	29.9	24.24	24.15	24.25	29.46	24.1933	29.7067	24.2133	5.26667	5.49333	0.0259762	0.0221994
32	24.94	25.05	24.66	20.46	20.48	20.84	28.62	28.78	28.57	20.11	20.78	20.52	24.8833	20.5933	28.6567	20.47	4.29	8.18667	0.0511189	0.00343216
33	26.33	26.44	26.42	21.04	21.21	21.16	30.12	29.76	29.53	22.59	22.43	22.58	26.3967	21.1367	29.8033	22.5333	5.26	7.27	0.0260965	0.00647906
34	24.55	24.28	24.36	22.44	22.18	22.28	28.42	27.56	28.32	23.18	23.8	23.24	24.3967	22.3	28.1	23.4067	2.09667	4.69333	0.233798	0.0386515
35	25.42	25.44	25.26	21.56	21.45	21.45	26.78	26.05	26.38	21.5	21.3	21.37	25.3733	21.4867	26.4033	21.39	3.88667	5.01333	0.0676078	0.0309625
36	23.48	23.56	23.84	21.89	21.8	21.63	25.28	25.28	25.02	20.93	20.03	20.34	23.6267	21.7733	25.1933	20.4333	1.85333	4.76	0.276752	0.036906
37	27.02	27.38	27.09	23.78	23.52	23.52	26.97	26.78	27.18	22.09	22.48	22.28	27.1633	23.6067	26.9767	22.2833	3.55667	4.69333	0.0849839	0.0386515
38	24.15	24.28	24.09	22.25	22.25	22.27	27.62	28.01	27.97	22.57	22.69	22.79	24.1733	22.2567	27.8667	22.6833	1.91667	5.18333	0.264866	0.0275208
39	25.21	24.87	25.06	20.65	20.37	20.46	26.72	26.95	27.08	20.16	20.31	20.12	25.0467	20.4933	26.9167	20.1967	4.55333	6.72	0.0425902	0.0094859
40	23.98	23.32	23.69	21.62	21.56	21.58	27.52	27.76	27.86	20.37	20.34	20.28	23.6633	21.5867	27.7133	20.33	2.07667	7.38333	0.237062	0.00598956
